# Supplementary material for: Akt-phosphorylated PIKE-A inhibits UNC5B-induced apoptosis in cancer cell lines in a p53-dependent manner
Source: PubMed Central journal article supplement — Mol Biol Cell. 2011 Jun 1;22(11):1943–54. doi: 10.1091/mbc.E10-11-0923 (PMC3103409; doi:10.1091/mbc.e10-11-0923), 2011-06-01

## Supplemental Figure Legends

### **Supplemental Figure 1. PIKE-A enhances the interaction between UNC5B and DAPK.**

HEK293 cells were cotransfected with HA-UNC5B and DAPK-Flag, then infected with or without adenovirus expressing PIKE-A, followed 200 ng/ml netrin treatment. Overexpression HA-UNC5B was immunoprecipitated with anti-HA antibody and the bound DAPK was detected using anti-Flag antibody (top panel). DAPK autophosphorylation at S308 was slightly decreased when PIKE-A was coexpressed (3<sup>rd</sup> panel).

### **Supplemental Figure 2. PIKE-A suppresses UNC5B-provoked apoptosis via p53.**

LN229 were cotransfected with HA-UNC5B, si-TP53 or control si-RNA in the presence of various Myc-tagged PIKE-A plasmids. Cells lysates were subjected to immunoblotting analysis with various indicated antibodies. Depletion of p53 reduced PIKE-A's inhibitory action on UNC5B-induced apoptosis (top and bottom panels). The data were represented as mean  $\pm$  SD from three independent experiments (\*  $p < 0.05$ , Student t-test).

### **Supplemental Figure 3. PIKE-A specifically interacts with UNC5B.**

**A.** PIKE-A selectively binds UNC5B in the absence of netrin-1. HEK293 cells were cotransfected with mGST-PIKE-A and HA-UNC5A, HA-UNC5B, or HA-UNC5A. mGST-PIKE-A was pulled down and the bound proteins were detected with anti-HA-HRP antibody. **B.** PIKE-A displays much stronger binding affinity to UNC5B than PIKE-L and -S in the absence of netrin-1. HEK293 cells were cotransfected with HA-UNC5B and mGST-tagged PIKE-S, PIKE-A, or PIKE-L. mGST-PIKE was pulled down with glutathione beads and the bound proteins were detected with anti-HA-HRP antibody.

# Supplemental Figure 1

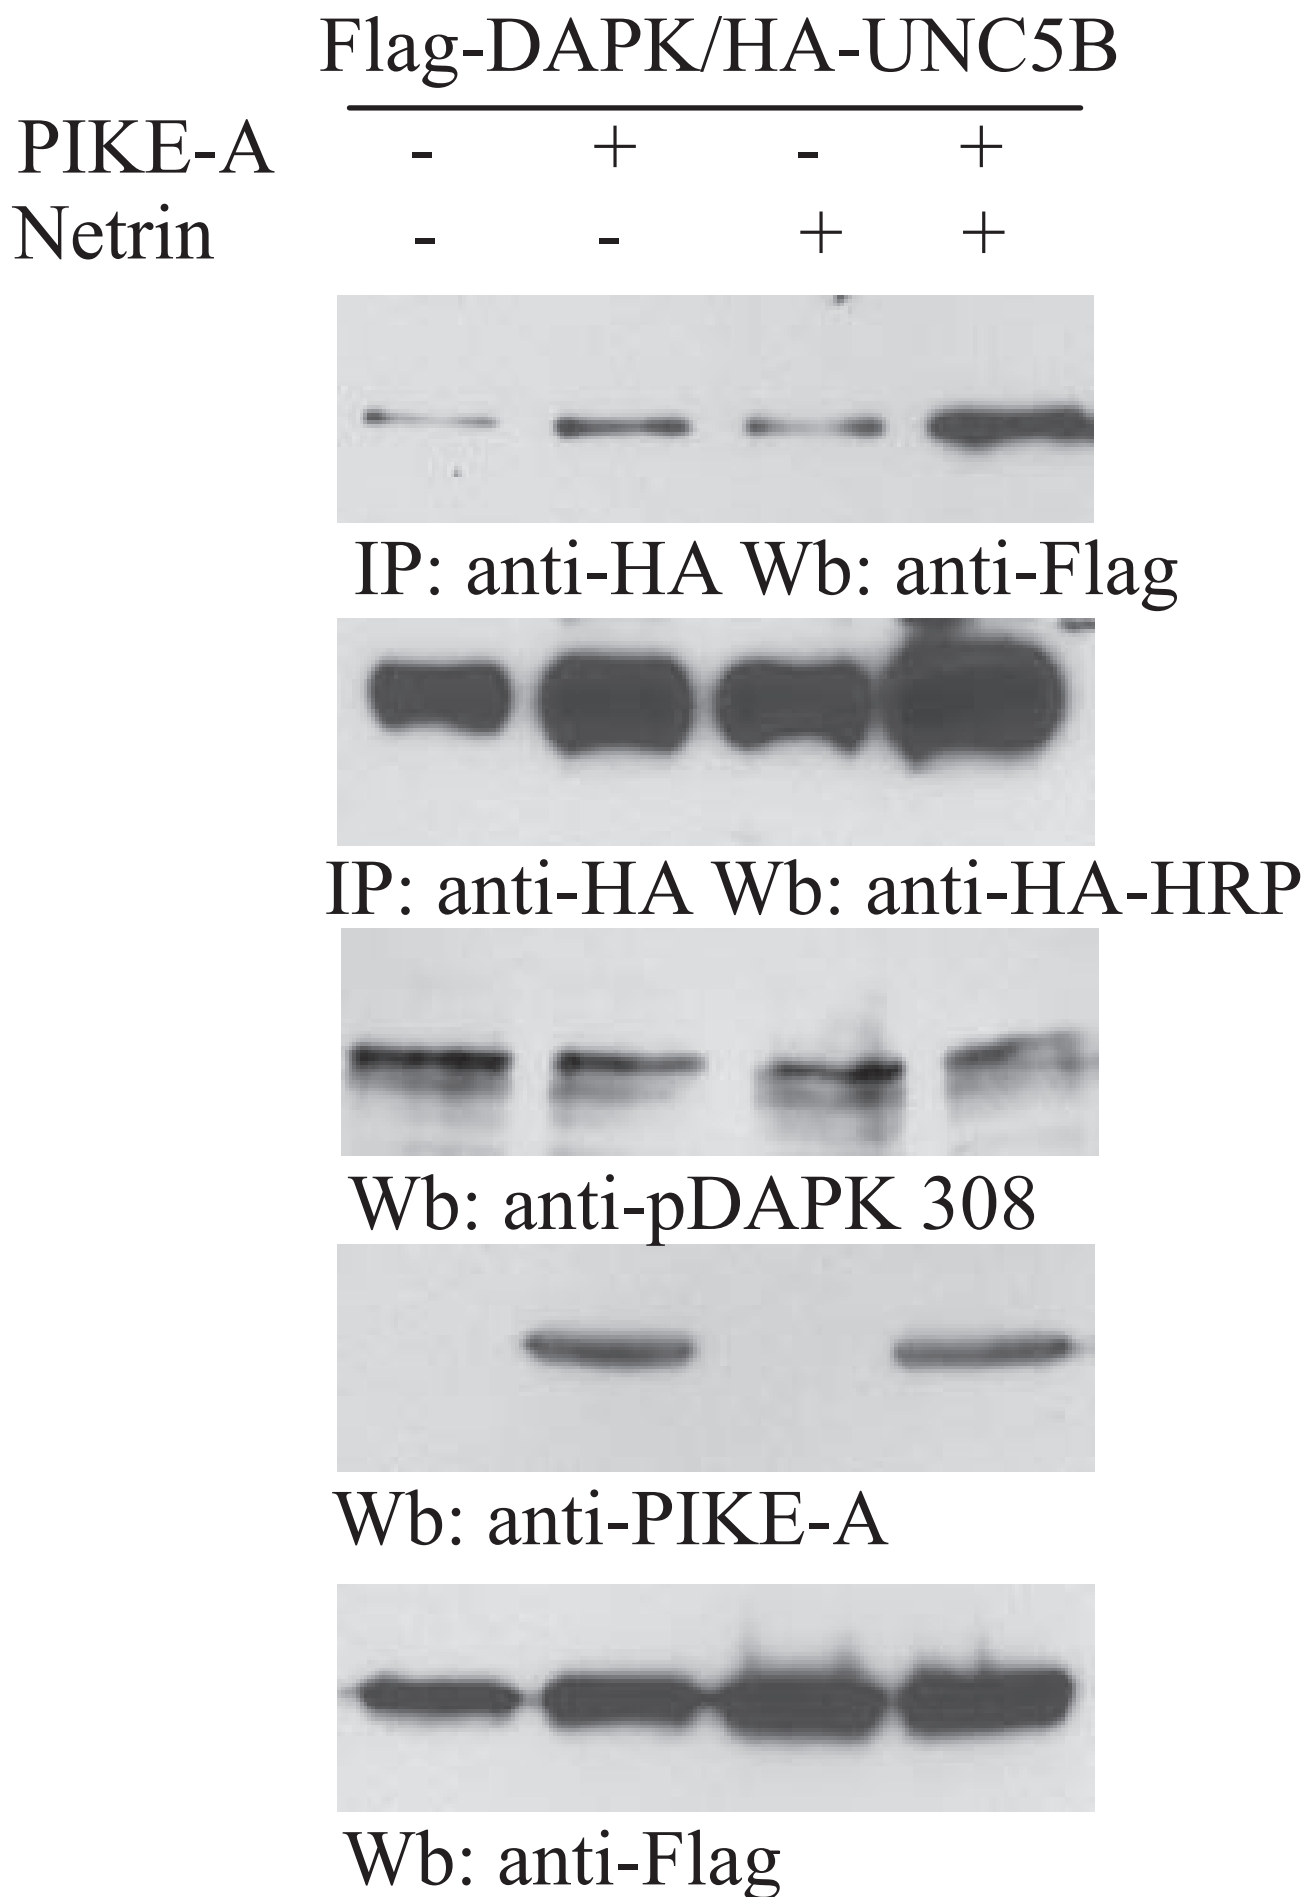

# Supplemental Figure 2

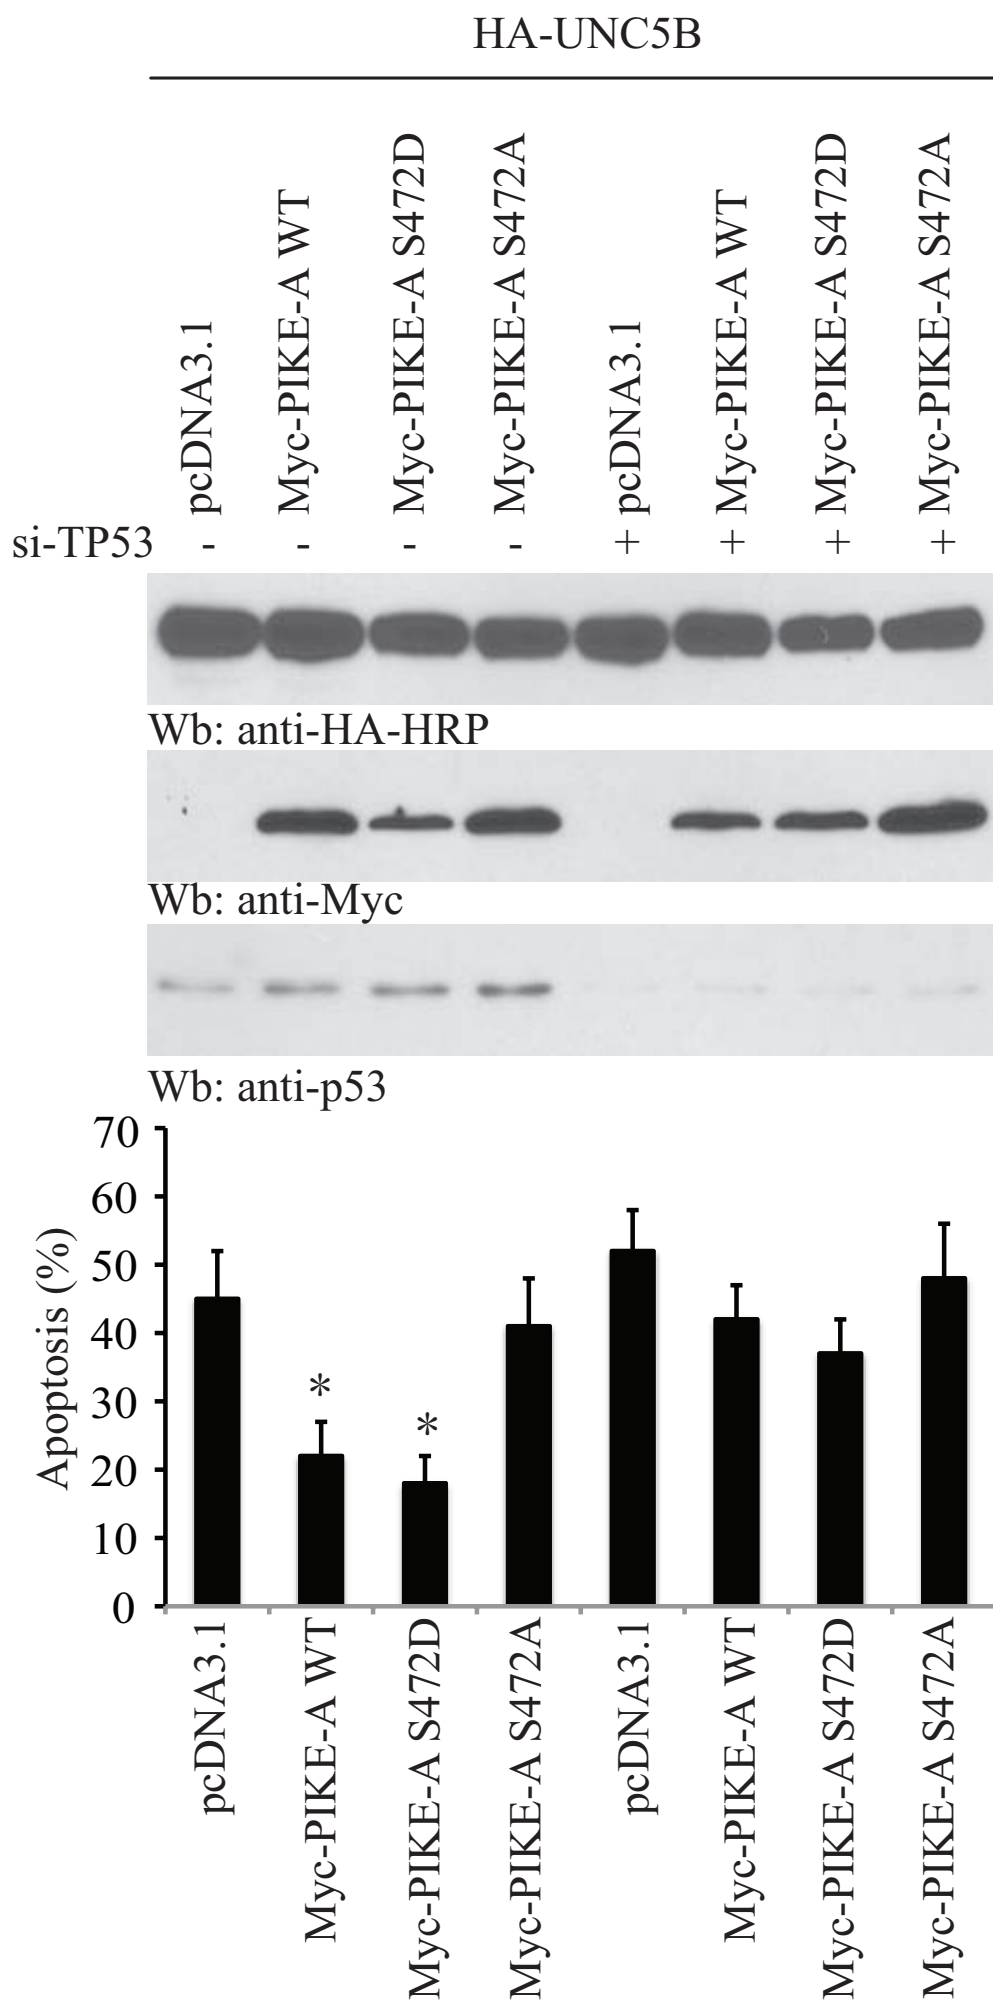

# Supplemental Figure 3

## A

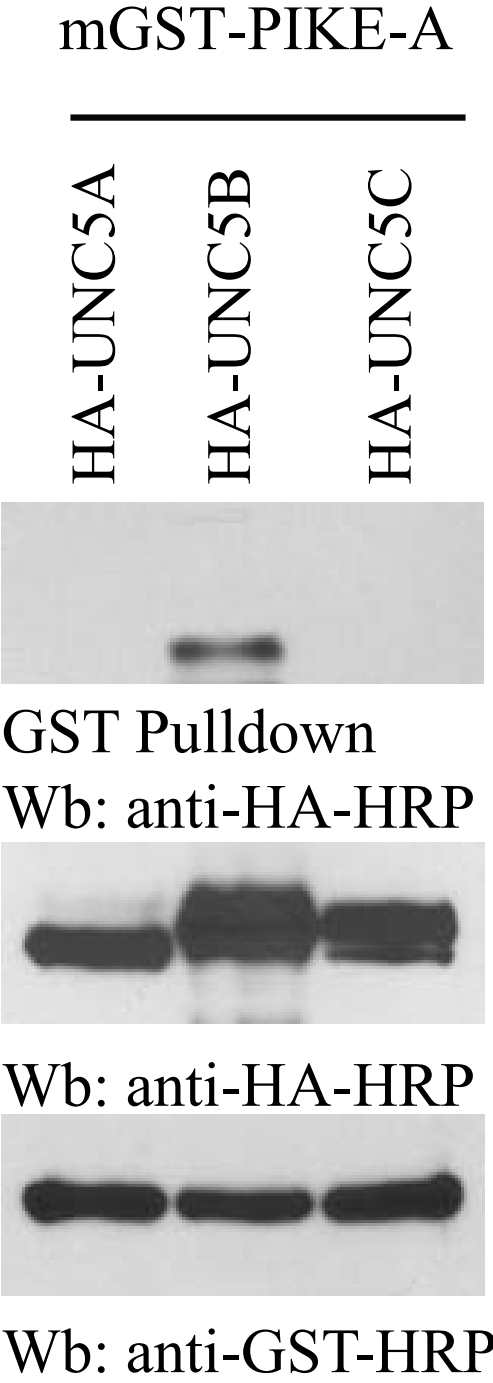

## B

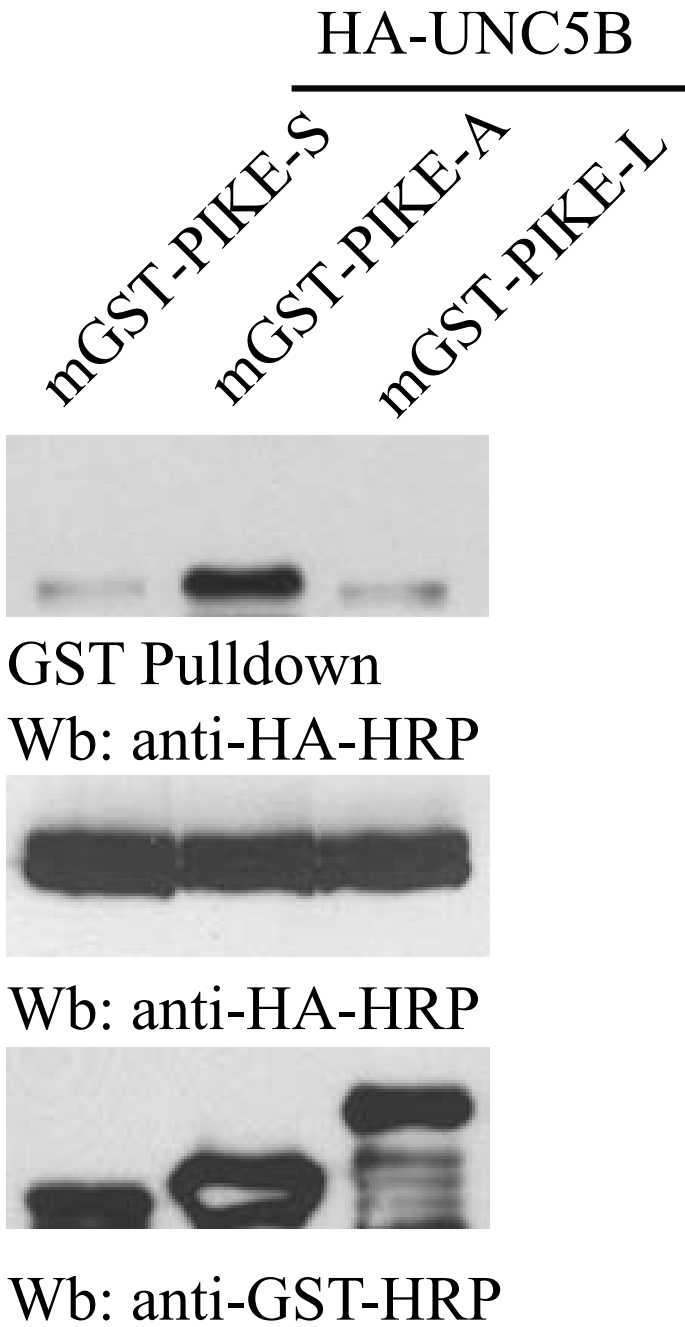

Supplement: E10-11-0923_1.pdf [file E10-11-0923_1.pdf]
